# Supplementary material
Source: PubMed Central journal article supplement (PMC3619334)
Supplement: 1303309110_pnas.201303309SI.pdf [file 1303309110_pnas.201303309SI.pdf]

# Supporting Information

Starita et al. 10.1073/pnas.1303309110

## SI Materials and Methods

**Plasmids and Oligonucleotides.** Oligonucleotide sequences are provided in Table S3. Ubiquitination factor E4B (Ube4b) U-box (E4BU, 1,092–1,173) and extended U-box domain (longE4BU, 1,072–1,173) in the pBG102 bacterial expression vector were gifts from W. Chazin (Vanderbilt University, Nashville, TN). The pBG102 construct adds an amino terminal His6-small ubiquitin-related modifier (SUMO)-H3C protease cleavage site to aid in protein solubility. Mutations were created using the Quickchange II mutagenesis kit (Agilent) and primers LS571–574, LS757–758, and LS793–806. The Flag-GFP expression vector was a gift from R. James (Seattle Children's Hospital, Seattle, WA). pcDNA3\_Flag-Ube4b and pcDNA3\_Flag-Ube4b $\Delta$ U-box were gifts from R. Leng (University of Alberta, Edmonton, AB, Canada). A cDNA clone harboring human UBE4B variant 2 (NM\_006048.4) was purchased from Open Biosystems, PCR-amplified, and cloned into the pcDNA3 vector with an amino-terminal Flag tag. Mutants were created using primers LS757–758, LS768–769, and LS837–844. Mutation P1140T (dsSNP identifier rs15191) was identified in the genome of J. Craig Venter. The full-length ORFs were verified by sequencing. Phosphorylated CMV (pCMV)-neo-p53 and pCMV-Myc3-human double minute 2 (Hdm2) were purchased from Addgene.

**T7 Bacteriophage Constructs.** The E4BU (1,092–1,173) and longE4BU (1,072–1,173) were PCR-amplified with primers LS569–570 and LS788 and cloned into the genome of T7-Select 10-3b bacteriophage (EMD Millipore), packaged into phage particles, amplified in *Escherichia coli* strain BLT5403, and titered according to the T7-Select Cloning Kit instructions (EMD Millipore). The T7\_H3C\_HA\_longE4BU and E4BU phages were constructed similarly using primer LS789–792.

**T7 LongE4BU Variant Library Preparation.** Oligonucleotides for cloning the E4BU library were ordered from TriLink Biotechnologies, and all other oligonucleotides were ordered from IDT. The 306 nucleotides that encoded the variable region were synthesized with a 2% error rate, corresponding to 99.325% of the correct base and 0.225% of each incorrect base. Stop codons were inserted in all three frames 3' of the coding region, followed by the degenerate 18-base barcode. These DNA features were spread over two oligonucleotides, LS714 and LS715. The 3' oligonucleotide was phosphorylated. One hundred picomoles of each oligonucleotide was annealed and ligated together in the presence of 1 nmol of a guide oligonucleotide (LS699) that was terminated with a dideoxynucleoside to prevent its extension. The oligonucleotides in T4 DNA ligase buffer were heated to 90 °C in a thermocycler set to reduce the temperature 0.1 °C/min until it reached room temperature. T4 DNA ligase (New England Biolabs) and 1 mM DTT were added to the annealed oligonucleotides and incubated overnight at 16 °C. The ligation reaction was purified using the DNA Clean and Concentrator Kit (Zymo Research). To make the full-length construct double-stranded, 200 pmol of short oligonucleotide (LS713) was annealed to a common sequence 3' of the barcode as above but in phi29 polymerase buffer (New England Biolabs). After annealing and addition of dNTPs, the short oligonucleotide was extended with phi29 polymerase (New England Biolabs) for 3 h at 30 °C to make a dsDNA construct. The double-stranded product was purified, cut with EcoRI and HindIII (New England Biolabs), and ligated into the genome of T7-Select 10-3b bacteriophage. Phage genomic DNA was packaged into phage particles, the number of ligation/package events was es-

timated by titer, and the phages were then amplified in *E. coli* strain BLT5403 according to the T7-Select Cloning Kit instructions.

According to plaque titrating assays, 5 million phages were packaged following the ligation and packaging reactions. We PCR-amplified and Sanger-sequenced a small number of individual plaques; of those, 10% were empty phages and nearly 50% had deletions stemming from the use of long oligonucleotides to make the construct. We estimate that there were 2 million ligation events that encoded a uniquely barcoded, full-length longE4BU protein.

**Plaque PCR and Sequencing.** For bulk population analysis of mixtures of two phage populations, as in Fig. S1C, 1  $\mu$ L of phage lysate was used in a PCR assay to amplify the longE4BU inserts from the phage genome with primers LS826–827. The PCR product was sequenced, and the ratio of the mixed bases coding for the mutant position was quantified using the PeakPicker algorithm (1). To assess the diversity of the population for the deep mutational scanning, the longE4BU insert was PCR-amplified from individual plaques. Agarose containing the plaque was picked with a pipette tip and mixed with 25  $\mu$ L of LB. One microliter of the mixture was used to amplify the longE4BU insert with Taq polymerase. The amplicons were purified and Sanger-sequenced with primer LS826.

**Library Preparation for Tag-Directed Subassembly and Barcode Counting.** DNA was purified from 200  $\mu$ L of amplified phage lysates before and after selection by phenol chloroform extraction and ethanol precipitation. To create the overlapping Illumina libraries for tag-directed subassembly as described in Fig. S2B, 800 ng of total DNA from the input sample was used as a template for PCR. Two hundred-microliter PCR reactions were performed over 12 cycles using Phusion polymerase (New England Biolabs) and oligonucleotides LS725, LS727–729, and LS749. The amplicons were purified with Qiaquick PCR purification columns (Qiagen) and again with the DNA Clean and Concentrate Kit (Zymo Research) and quantified using Qbit (Invitrogen). Each PCR-generated Illumina library was subjected to paired-end 101-base reads in separate lanes on a HiSeq2000 (Illumina) using primers LS730–733 for read 1 and primer LS724 for read 3. To create Illumina libraries for sequencing of the 18-base barcodes, 800 ng of total phage DNA was used as a template in 200  $\mu$ L of Phusion polymerase (New England Biolabs) PCR reactions over 12 cycles using oligonucleotides LS749 and LS737–741. The amplicons were purified and quantified as above. Samples were indexed by addition of an 8-base sequence on the reverse primer LS737–741 and subject to single-end 36-base reads with an 8-base index read using primers LS724 and LS748 on an Illumina Genome AnalyzerIIx.

**Tag-Directed Subassembly.** The reads and barcodes from each nested library were filtered for quality. Reads were discarded if they contained random “N” bases, more than 9 Q2 bases, or homopolymeric runs of more than 7 bases in the read. Barcodes (the first 18 bases of the reverse read) were discarded if they contained Ns, more than 4 Q2 bases, or homopolymeric runs of more than 7 bases in the read (Table S1). Filtered fastq files generated by sequencing from the ends of the overlapping amplicons described above were combined. Forward reads were grouped by the sequence of the 18-base barcode (the first 18 bases of the reverse read). A Smith–Waterman algorithm was used to align the grouped reads to the WT longE4BU sequence, and a consensus sequence was determined for each barcode group as in the studies by Hiatt et al. (2) and Patwardhan et al. (3). A minimum quality score

of 20 was required for a base to contribute to an assembly. Full-length subassembled longE4BU sequences were filtered for quality by requiring that a given base in the assembly was observed at least twice and was present at an intratag group allele frequency of 1 for positions covered by two or three reads or at a frequency of at least 0.75 for positions covered by four or more reads. If these conditions were not met, the assembly was discarded. A database of barcodes and their associated full-length longE4BU assembly was created to facilitate linking barcodes sequenced from the experimental samples to the full-length subassemblies.

**Barcode Sequencing and Conversion to LongE4BU DNA Sequences.** Barcodes from the input variant library and after round 3 of selection were PCR-amplified and sequenced by 36-base single-end reads. The reads were trimmed to 18 bases and reverse-complemented to match the polarity of the barcode reads from the subassembly. Barcode reads were discarded if they contained Ns, more than 4 Q2 bases, or homopolymeric runs of more than 7 bases. For every barcode sequence from each sample, we attempted to match it to a barcode and subassembly from the database created above. The barcode matching attempt led to three possible outcomes: (i) the barcode did not match any of the barcodes associated with a subassembly and was discarded, (ii) the barcode matched an incomplete subassembly and was discarded, or (iii) the barcode matched a full-length subassembly and was converted to the longE4BU sequence (Table S2).

**Expanded Protein Purification.** E4BU or longE4BU in pBG102 expression plasmids was transformed into BL21 (DE3) chemically competent cells (Agilent). pBG102 expression plasmids create a translational fusion of 6× His-SUMO-E4BU. For longE4BU purifications, 500 mL of midlog LB + kanamycin cultures were induced with 0.2 mM isopropyl-β-D-thiogalactopyranoside and grown overnight at 18 °C. Cultures were cooled on ice and spun at 4,000 × g for 20 min. Pellets were resuspended in 20 mL of 25 mM Tris, 200 mM NaCl, and 5 mM imidazole (pH 7.6), and were then lysed with 1.2 mL of 20 mg/mL lysozyme and small scoops of powdered RNaseA and DNaseI followed by incubation on ice for 30 min. Lysates were sonicated and cleared by spinning at 12,000 × g for 20 min. The E4BU (1,092–1,173) mutants used for CD, NMR, and lysine reactivity assays were grown in 1-L cultures induced

as above; however, they were lysed using a French press. His-tag purifications were carried out by incubating cell lysate with 1 mL Talon Agarose Beads (Clontech) for 1 h at 4 °C. Beads were washed two times with 20 mL of binding buffer [25 mM Tris, 200 mM NaCl, 5 mM imidazole (pH 7.6)] and eluted with 25 mM Tris, 200 mM NaCl, and 500 mM imidazole (pH 7.6). Talon column elutions were cleaved overnight with GST-tagged H3C protease while being dialyzed into 25 mM Tris and 200 mM NaCl (pH 7.6). The protein mix was subjected to a GST capture using 1 mL of GE Glutathione Sepharose 4 Fast Flow beads at 4 °C for 45 min to collect the GST-tagged H3C protease. The flow-through was subjected to a His capture with 1 mL of Talon Agarose Beads at 4 °C for 1 h to bind 6× His-SUMO, and the flow-through containing purified E4BU was collected. Samples were concentrated using Amicon Ultra-15 3,000 molecular weight cutoff spin tubes (Millipore). E4BU proteins underwent a final size exclusion chromatography step over an SDX75 column into 25 mM NaPi and 150 mM NaCl at pH 7.0 (for NMR and lysine reactivity assays) or 10 mM NaPi and 30 mM NaCl at pH 7.0 (for CD). Protein purity was assessed as >95% by SDS/PAGE followed by Coomassie staining. Quantification of protein concentration was determined using the extinction coefficient for both E4BU constructs of 6.99 mM<sup>-1</sup>·cm<sup>-1</sup>.

**Lysine Reactivity Assay.** UbcH5c~Ub(K0) conjugate was preformed by incubation of E1, E2, Ub, and ATP/Mg for 30 min. The “K0” Ub construct was HA-tagged and contained arginine or methionine mutations at all lysine positions to prevent Ub chain formation. The conjugate was combined with E4BU (WT or mutant) and free lysine. Reaction samples were quenched in nonreducing SDS sample buffer at the specified time points. Ub transfer to lysine was monitored by disappearance of the UbcH5c~Ub species and appearance of lysine-linked Ub, as observed in Western blots probed for the HA epitope on Ub.

**CD.** Far-UV CD spectra were recorded on an Aviv model 420 spectrometer at 25 °C in a 1-mm path-length quartz cell. For each E4BU variant, 50 μM samples were prepared in 10 mM sodium phosphate (pH 7.0) and 30 mM NaCl. Signals were recorded with 5-s averaging times, and thermal melts were performed in increments of 2°.

1. Ge B, et al. (2005) Survey of allelic expression using EST mining. *Genome Res* 15(11): 1584–1591.
2. Hiatt JB, Patwardhan RP, Turner EH, Lee C, Shendure J (2010) Parallel, tag-directed assembly of locally derived short sequence reads. *Nat Methods* 7(2):119–122.

3. Patwardhan RP, et al. (2012) Massively parallel functional dissection of mammalian enhancers in vivo. *Nat Biotechnol* 30(3):265–270.

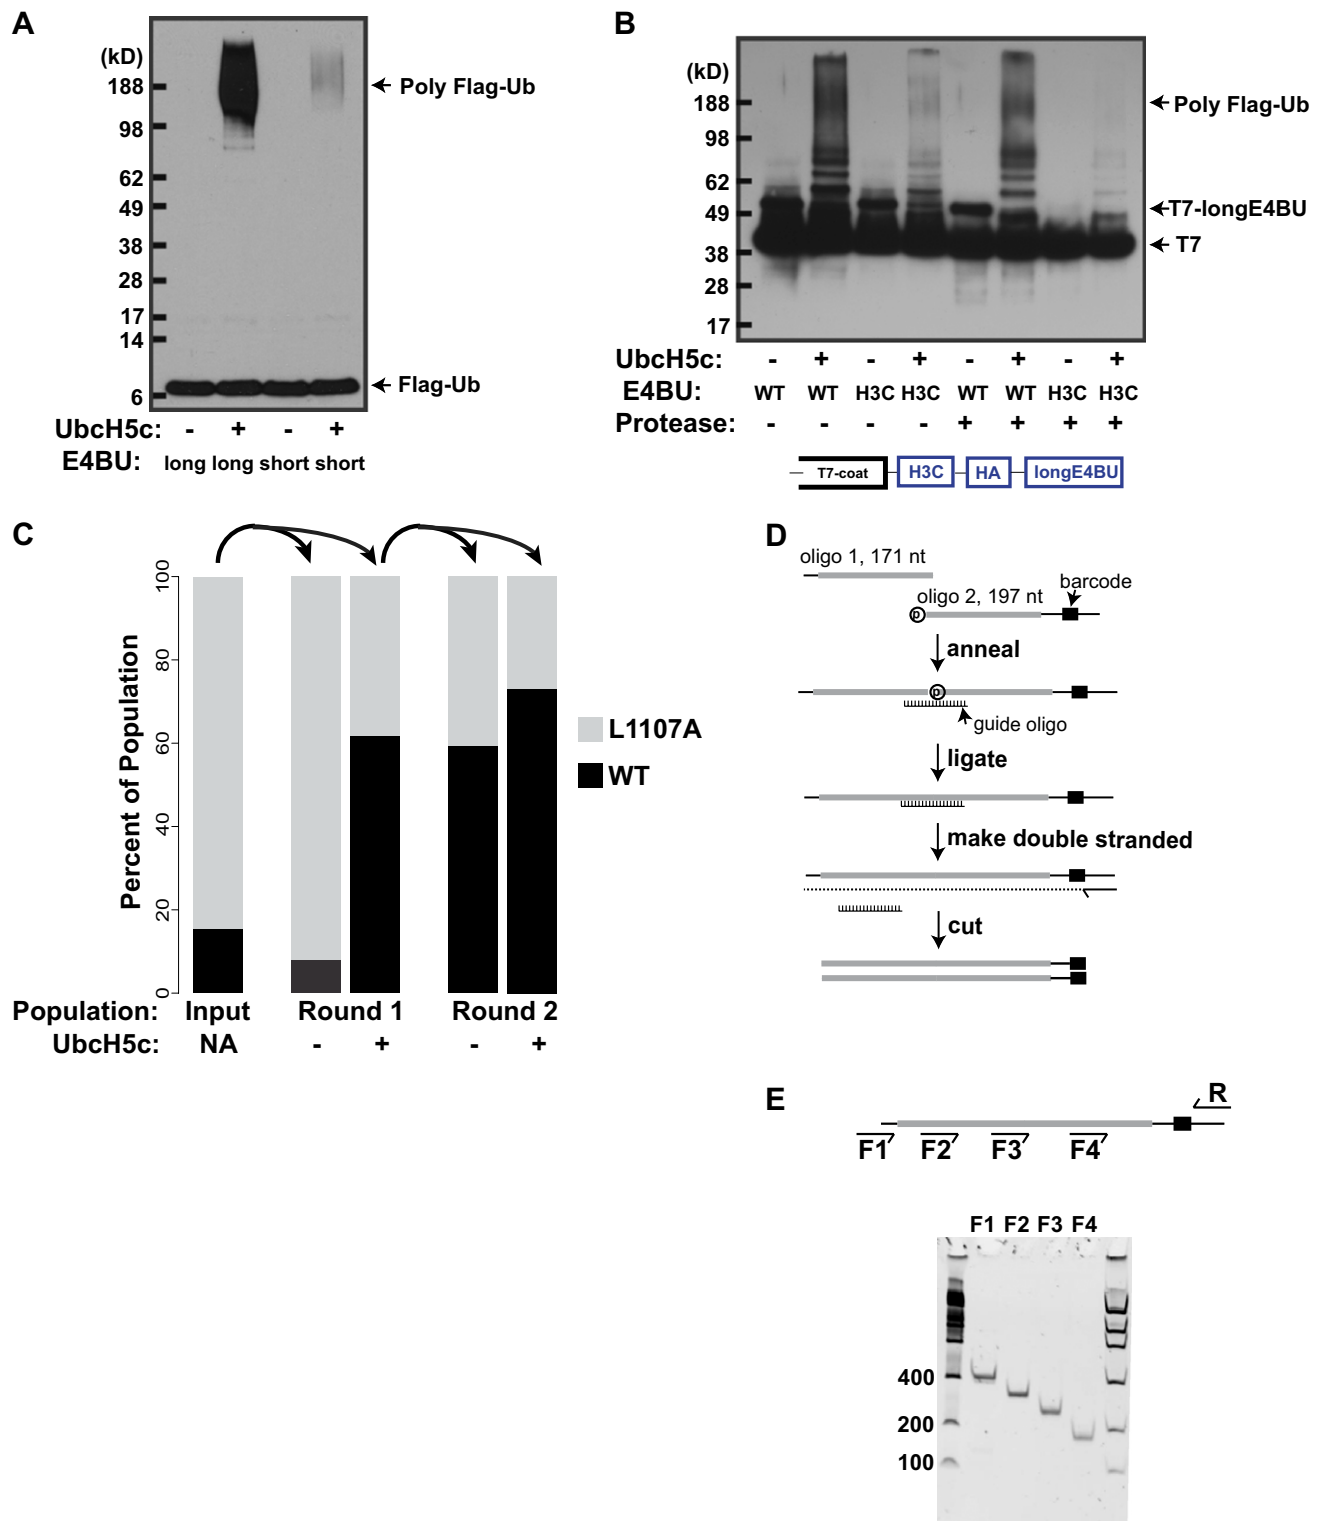

**Fig. S1.** (A and B) Evidence for auto-ubiquitination by T7-E4BU. (A) Minimal U-box of E4BU does not support robust Ub polymerization. Either longE4BU (1,072–1,173) or minimal E4BU (1,092–1,173) was fused to the coat protein of T7 bacteriophage. The minimal E4BU is lacking four lysine residues that are presumed to be auto-ubiquitination targets (1). Amplified phage lysate was incubated with purified E1, UbcH5c, ATP, and Flag-Ub. The reaction was resolved by SDS/PAGE, transferred to a PVDF membrane, and probed with anti-Flag antibodies. (B) Protease cleavage between the U-box and T7 coat protein reduces high-molecular-weight species. The longE4BU with an HA tag and an H3C protease cleavage site was fused to T7 coat protein as diagrammed. Amplified WT or H3C-HA-E4BU phage lysates were incubated with purified E1, UbcH5c, ATP, and Flag-Ub. Following the ubiquitination reaction, the mixture was incubated with GST-H3C protease. The reaction was resolved by SDS/PAGE, transferred to a PVDF membrane, and probed with monoclonal anti-T7 antibodies. E4BU and H3C cleavage is as indicated. (C) WT T7-E4BU is enriched after selection for ubiquitinated T7 bacteriophage. For round 1 of selection, amplified phage lysates from WT and the L1107A variant of T7-longE4BU were mixed at a 1:5 ratio (Input) and incubated with purified E1, ATP, and Flag-Ub with or without UbcH5c as indicated. Flag-ubiquitinated phages were purified with anti-Flag agarose and eluted with Flag peptide. Eluates were reamplified in *E. coli*. The longE4BU

Legend continued on following page

inserts were amplified by PCR from the phage lysate and Sanger-sequenced. The ratio of the mixed bases coding for the mutant position was quantified using the PeakPicker algorithm and is represented in the bar graphs (2). The eluate from the ubiquitination reaction with UbcH5c from round 1 of selection was used as the input for round 2 of selection, as indicated by the arrows. NA, not added. (D) Diagram of T7-E4BU variant cloning. Because the longest oligonucleotide we were able to purchase was 200 bases, we spread features of the library across two oligonucleotides whose lengths are indicated. The longE4BU is represented as gray boxes and was synthesized with two mutations per 306 nucleotides encoding the 102 amino acids of longE4BU. Oligo 2 was synthesized with a 5' phosphate. Oligo 2 also codes for a stop codon in all three frames 3' of the E4BU ORF, an 18-base degenerate barcode (black box), and a common sequence. The oligos were annealed to a guide oligo synthesized with a 3' dideoxynucleotide to prevent polymerase extension and ligated together with T4 DNA ligase. This construct was made double-stranded by annealing a short oligo to a common sequence 3' of the barcode and extending that oligo with the strand displacing polymerase phi29. The double-stranded construct was cut with EcoRI and HindIII and ligated into T7-Select 10-3b bacteriophage arms in the purchased T7-Select Cloning Kit. (E) Nested amplicons for tag-directed subassembly. Oligonucleotides for amplification of nested amplicons are represented by arrows. The 101-base sequences of the forward read of each amplicon were designed to overlap by 10 nucleotides. The first 18 bases of the reverse (R)-sequencing read comprise the barcode. Each amplicon was separated on a 10% Tris/borate/EDTA gel and stained with SYBR gold. Sequencing and subassembly statistics are provided in Table S1.

1. Nordquist KA, et al. (2010) Structural and functional characterization of the monomeric U-box domain from E4B. *Biochemistry* 49(2):347–355.
2. Ge B, et al. (2005) Survey of allelic expression using EST mining. *Genome Res* 15(11):1584–1591.

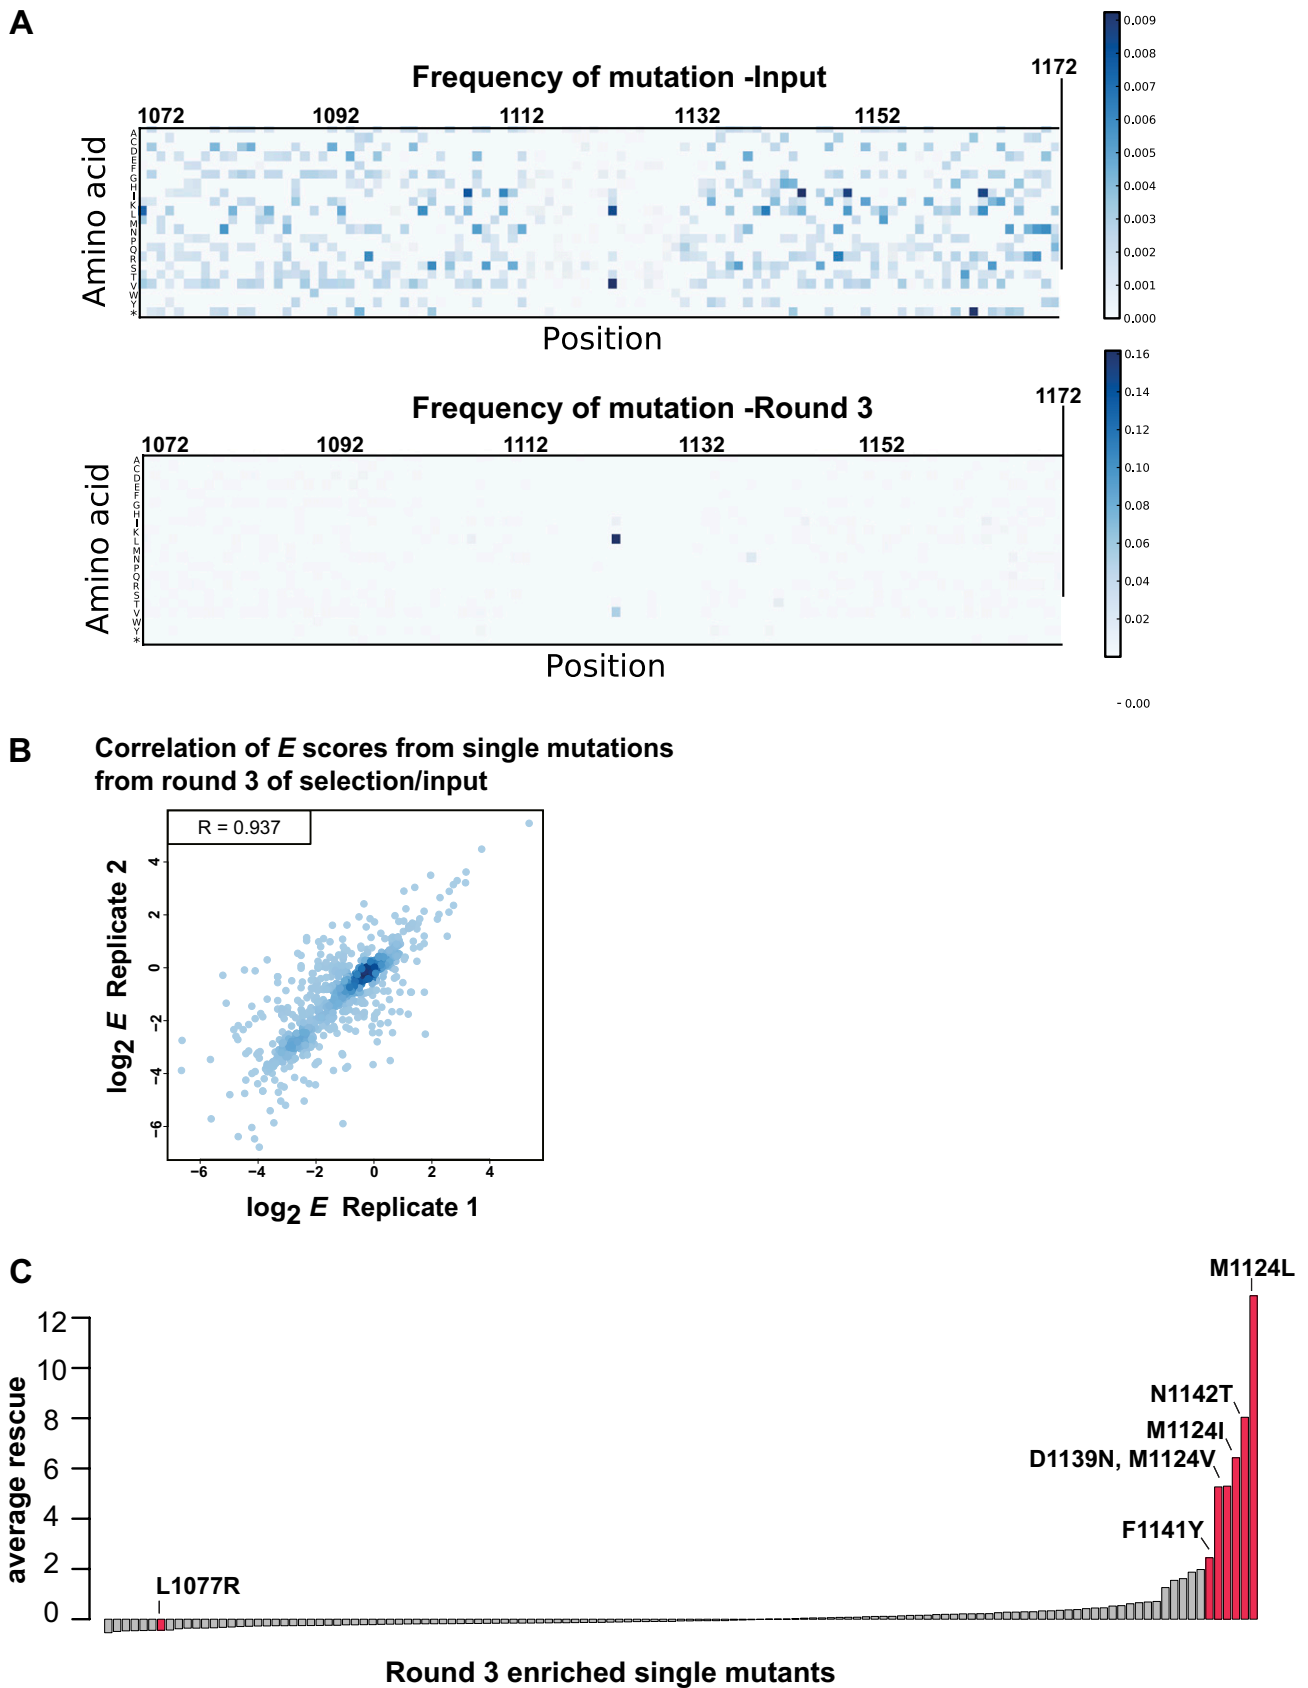

Fig. S2. (A) Mutations within longE4BU are distributed throughout the protein. The frequency of occurrence of each amino acid substitution in the input (Upper) and round 3 (Lower) populations is plotted as a heat map with the position of the longE4BU across the horizontal axis and each possible amino acid change on the vertical axis. Scales are shown to the right. Note that the mutations in the input library are not completely random. (i) Mutations are depleted Legend continued on following page

between amino acid positions 42 and 60. We believe that this occurred because the nucleotides that code for these positions must anneal to the guide oligonucleotide used in the ligation step (as shown in *A*). Some mutations in this region may have caused inefficient annealing and ligation and would therefore be depleted in the library. *(ii)* As expected from random mutagenesis, changes to amino acids that required more than one nucleotide change are less common. For example, an amino acid change to W, which is encoded by only a single codon, occurred only once throughout the whole domain. *(B)* *E* scores for technical replicates of the longE4BU deep mutational scan are highly concordant. Correlation of *E* scores of variants containing a single mutation from two experimental replicates of selection are shown. A Pearson correlation coefficient of 0.93 was calculated for the two datasets. *(C)* Mutations found in highly enriched variants can rescue most other mutations. To assess the functional importance of enriched mutations, we evaluated their ability to rescue detrimental mutations when the two are paired. To this end, we calculated an average rescue score ( $\bar{R}$ ) for variants with  $E > 1$  by the following steps. To calculate  $\bar{R}$  for a mutation X (where  $E_X > 1$ ), we identified all double mutants that contain X and another mutation Y. We excluded single mutations found in fewer than 50 doubly mutated variants. Next, we subtracted  $E_Y$  from  $E_{X,Y}$  and averaged all these remainders to determine  $\bar{R}$ . For 120 of the 132 mutations for which we could calculate an average rescue score,  $\bar{R}$  was near zero, indicating that they did not rescue second site mutations because, on average,  $E_{X,Y}$  and  $E_Y$  were similar. However, when, on average,  $E_{X,Y} \gg E_Y$ , we suggest that  $E_X$  was able to rescue  $E_Y$  when paired. The average  $\bar{R}$ s for variants with an *E* score  $>1$  that were observed in combination with  $\geq 50$  secondary mutations are shown. Select mutations are indicated.



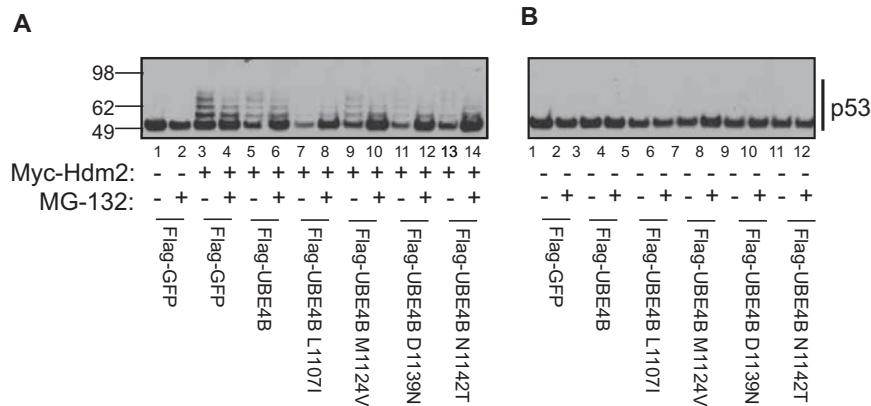

**Fig. 54.** UBE4B-induced degradation of p53 is proteasome- and Hdm2-dependent. (A) H1299 cells were transfected with phosphorylated CMV (pCMV)-neo-p53, and the cells in lanes 3–14 were also transfected with pCMV-Myc3-Hdm2. Flag-tagged, full-length human UBE4B constructs were transfected as indicated. Twenty-five micromolar MG132 or DMSO was added 5 h before cell lysis. Protein concentration was quantified by Bradford assay, and 10  $\mu$ g of protein was separated by SDS/PAGE and transferred to a PVDF membrane. Blots were probed for p53. (B) H1299 cells were transfected with pCMV-neo-p53 and UBE4B in the absence of Hdm2. Twenty-five micromolar MG132 or DMSO was added 5 h before cell lysis. Protein concentration was quantified by Bradford assay, and 10  $\mu$ g of protein was separated by SDS/PAGE and transferred to a PVDF membrane. Blots were probed for p53.

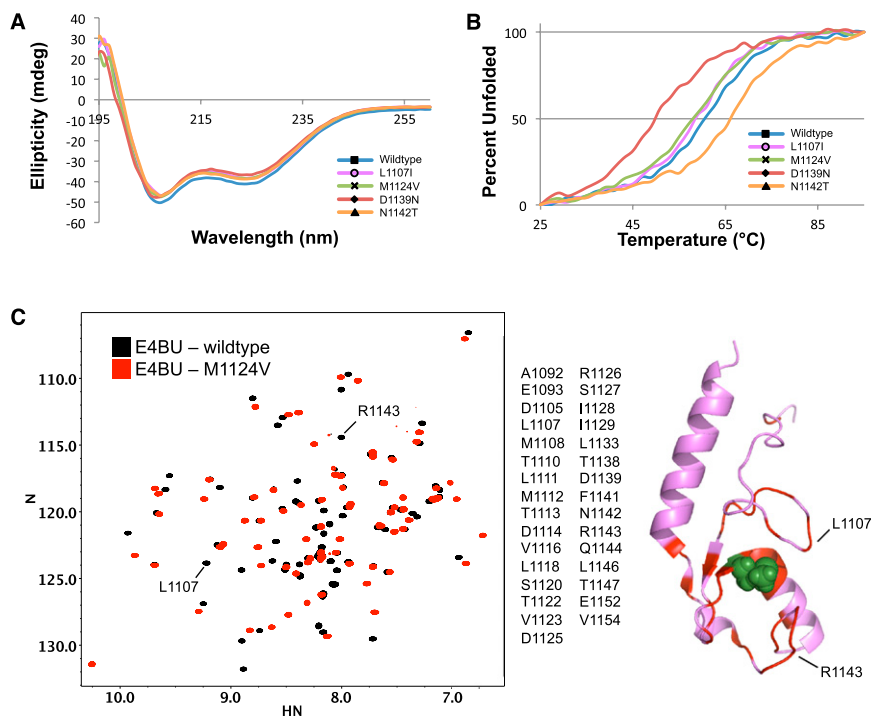

**Fig. 55.** Variants with activity-enhancing mutations do not have changes in their secondary structure nor are they significantly more thermodynamically stable. (A) CD wavelength scans from 195 to 260 nm are shown for 50  $\mu$ M samples of E4BU WT (blue), L1107I (magenta), M1124V (green), D1139N (red), and N1142T (orange). mdeg, millidegrees. (B) Thermal melts following CD signal at 220 nm were used to determine melting temperature ( $T_m$ ) values for E4BU WT (61  $^{\circ}$ C), L1107I (59  $^{\circ}$ C), M1124V (57  $^{\circ}$ C), D1139N (50  $^{\circ}$ C), and N1142T (66  $^{\circ}$ C). The color scheme is the same as in A. All ellipticity data were normalized to 0% and 100% unfolded using the first and last data points, respectively. (C)  $^1$ H,  $^{15}$ N heteronuclear single quantum coherence (HSQC) transverse relaxation-optimized spectroscopy (TROSY) overlay of WT (black) and M1124V E4BU (red). E4BU M1124V resonances that have shifted off the peak in the WT spectrum are listed and mapped onto the E4BU structure in red. The M1124 position is shown in green spheres. Assignments of select resonances that show large perturbations are labeled, and their positions in the structure are marked.







**Table S2. Summary of barcode sequencing and conversion to subassembled and quality filtered longE4BU sequences**

| Sample                      | Input  | Replicate 1 | Replicate 2 |
|-----------------------------|--------|-------------|-------------|
| Round of selection          | NA     | 3           | 3           |
| Total barcodes*             | 24.44  | 19,051      | 17,804      |
| Total no assembly*          | 15.271 | 7,411       | 6,956       |
| Unique no assembly*         | 2.327  | 1,524       | 1.32        |
| Total Incomplete assembly*  | 0.167  | 0.046       | 0.038       |
| Unique incomplete assembly* | 0.01   | 0.007       | 0.005       |
| Total assembly match*       | 9.001  | 11,594      | 10,811      |
| Unique assembly match*      | 0.563  | 0.49        | 0.448       |
| Assembly match, %           | 36.8   | 60.9        | 60.7        |

NA, not applicable.  
\*Millions.

**Table S3. Oligonucleotide sequences**

| Primer name | Description                 | Sequence 5'→3'                                                                                                                                                                                                       |
|-------------|-----------------------------|----------------------------------------------------------------------------------------------------------------------------------------------------------------------------------------------------------------------|
| LS574       | mmE4B(1,072–1,173) L1107I C | gtcatcagggtgtccatGaTagggctctgaactcg                                                                                                                                                                                  |
| LS575       | mmE4B(1,072–1,173) R        | aagcttTCAGTGGTCACTGCTCTGTTCT                                                                                                                                                                                         |
| LS576       | mmE4B(1,072–1,173) L1107A W | gacgagttcagagaccctgcGatggacaccctgatgac                                                                                                                                                                               |
| LS577       | mmE4B(1,072–1,173) L1107A C | gtcatcagggtgtccatCgcagggtctctgaactcgtc                                                                                                                                                                               |
| LS578       | mmE4B(1,072–1,173) L1107I W | cgagttcagagaccctAtCatggacaccctgatgac                                                                                                                                                                                 |
| LS579       | mmE4B(1,072–1,173) L1107I C | gtcatcagggtgtccatGaTagggctctgaactcg                                                                                                                                                                                  |
| LS714       | Variant library oligo 1     | CCGGCCGAATTCTatagagaagtttaaactcttgcagagaaagtggaggaatcggtggcaagaatgctg<br>gggcagaaatagactacagcagatgccccggacgagttcagagaccctctgatggacaccctgatgaccgatccc<br>gtgagactgccctctggcaccgtcat                                   |
| LS715       | Variant library oligo 2     | ggaccgttctatcatctgctggcatctgctcaactccccaccgaccctt<br>caaccgccagatgctgactgagagatgctggagccagtgccagagc<br>taaaggagcagattcaggcctggatgagagagaacagagcagtgac<br>cacTGAATAGAATGAnnnnnnnnnnnnnnnnnnnnnnAAGCT<br>TACGCCGCACCGG |
| LS737       | E4B-index01_CG-R            | CAAGCAGAAGACGGCATAACGAGATAAAACCCCCC AAG GGG TTA ACT AGT TAC<br>TCG AGT GCG G                                                                                                                                         |
| LS738       | E4B-index02_CG-R            | CAAGCAGAAGACGGCATAACGAGATTTTTCCCCC AAG GGG TTA ACT AGT TAC TCG<br>AGT GCG G                                                                                                                                          |
| LS739       | E4B-index03_CG-R            | CAAGCAGAAGACGGCATAACGAGATCCCCAAAACCC AAG GGG TTA ACT AGT TAC TCG<br>AGT GCG G                                                                                                                                        |
| LS740       | E4B-index04_CG-R            | CAAGCAGAAGACGGCATAACGAGATGGGAAAACCC AAG GGG TTA ACT AGT TAC TCG<br>AGT GCG G                                                                                                                                         |
| LS741       | E4B-index05_CG-R            | CAAGCAGAAGACGGCATAACGAGATCACCACCACC AAG GGG TTA ACT AGT TAC TCG<br>AGT GCG G                                                                                                                                         |
| LS742       | E4B-index06_CG-R            | CAAGCAGAAGACGGCATAACGAGATGTGGTGGTCCC AAG GGG TTA ACT AGT TAC TCG<br>AGT GCG G                                                                                                                                        |
| LS743       | E4B-index07_CG-R            | CAAGCAGAAGACGGCATAACGAGATTCATCATCCCC AAG GGG TTA ACT AGT TAC TCG<br>AGT GCG G                                                                                                                                        |
| LS744       | E4B-index08_CG-R            | CAAGCAGAAGACGGCATAACGAGATACTGACTGCC AAG GGG TTA ACT AGT TAC TCG<br>AGT GCG G                                                                                                                                         |
| LS745       | E4B-barcode-seq-F           | CTG GAT GAG AGA GAA ACA GAG CAG TGA CCA CTG AAT AGA ATG A                                                                                                                                                            |
| LS757       | Ube4b-M1124V-W              | CCTCTGGCACCGTCTGGACCGTTCTATC                                                                                                                                                                                         |
| LS758       | Ube4b-M1124V-C              | GATAGAACGGTCCACGACGGTGCCAGAGG                                                                                                                                                                                        |
| LS768       | HS-UBE4B-M1124V-W           | CTGCCCTCTGGCACCATCGTGACCGCTCCATCATCC                                                                                                                                                                                 |
| LS769       | HS-UBE4B-M1124V-C           | GGATGATGGAGCGGTCCACGATGGTGCCAGAGGGCAG                                                                                                                                                                                |
| LS787       | E4BUF-BamHI                 | ggcccgGGATCCGCAGAAATCGACTACAGCGATG                                                                                                                                                                                   |
| LS788       | T7-E4BU_EcoRI_F             | cggcccggaattctGCAGAAATAGACTACAGCGATG                                                                                                                                                                                 |
| LS789       | T7_H3C_HA_E4B_W             | ccggccgaattctCTGGAAGTTCTGTTCAGGGGCCCTACCCATACGATGTTCC                                                                                                                                                                |
| LS790       | T7_H3C_HA_E4B_C             | CTTTCTGCAAGAAGTTTAAACTTCTATAGCGTAATCTGGAACATCGTATGGGTA                                                                                                                                                               |
| LS791       | T7_H3C_HA_E4B_F             | TACCATACGATGTTCCAGATTACGCTATAGAGAAGTTTAAACTTCTTGACAGAAAAG                                                                                                                                                            |
| LS792       | T7_H3C_HA_E4B_amplify_F     | ccggccgaattctCTGGAAGTTCT                                                                                                                                                                                             |
| LS793       | E4B_F1141Y_W                | CCCCACCGACCCCTACAACCGCCAGATG                                                                                                                                                                                         |
| LS794       | E4B_F1141_C                 | CATCTGGCGGTTGTAGGGGTCGGTGGGG                                                                                                                                                                                         |
| LS795       | E4B_Q1144A_W                | CCCCTCAACCGCGCATGCTGACTGAGAG                                                                                                                                                                                         |
| LS796       | E4B_Q1144A_C                | CTCTCAGTCAGCATCGCGGTTGAAGGGG                                                                                                                                                                                         |
| LS799       | E4B_D1139N_W                | GCTCAACTCCCCACCAACCCCTCAACCG                                                                                                                                                                                         |
